# Supplementary material
Source: MDPI journal article supplement (https://www.mdpi.com/search?q=toxics-09-00054)
Supplement: s001 [file toxics-09-00054-s001.pdf]

Article

# Supplementary Material: Microbial Population Dynamics in Model Sewage Treatment Plants and the Fate and Effect of Gold Nanoparticles

Karsten Schlich, Cecilia Díaz, Benjamin Gomez Pizarro, Burkhard Knopf, Ruben Schlinkert, Franziska Frederike Wege, Anne Jurack and Kerstin Hund-Rinke

**Table S1.** Number of sequences obtained and quality scores of the sequences for the 1st experiment (control/dispersant experiment).

| GENEWIZ NGS DATA REPORT |             |         |            |         |         |        |         |
|-------------------------|-------------|---------|------------|---------|---------|--------|---------|
| Sample                  | Length (bp) | # Reads | Bases (bp) | Q20 (%) | Q30 (%) | GC (%) | N (ppm) |
| 1                       | 249.52      | 98,436  | 24,561,461 | 97.28   | 95.89   | 53.28  | 1.42    |
| 2                       | 249.57      | 97,808  | 24,410,236 | 97.13   | 95.59   | 54.20  | 2.54    |
| 3                       | 249.53      | 108,208 | 27,001,593 | 93.27   | 90.48   | 53.16  | 2.22    |
| 4                       | 249.55      | 113,318 | 28,278,197 | 93.34   | 90.56   | 53.17  | 0.00    |
| 5                       | 249.53      | 103,112 | 25,729,944 | 93.26   | 90.47   | 53.23  | 0.00    |
| 6                       | 249.53      | 104,504 | 26,077,044 | 92.97   | 90.05   | 53.30  | 0.00    |
| 7                       | 249.54      | 100,426 | 25,060,715 | 93.36   | 90.61   | 53.10  | 1.60    |
| 8                       | 249.53      | 102,456 | 25,565,843 | 92.96   | 90.03   | 53.23  | 2.97    |
| 9                       | 249.54      | 100,540 | 25,088,593 | 93.18   | 90.33   | 53.27  | 0.20    |
| 10                      | 249.53      | 104,496 | 26,074,971 | 93.19   | 90.33   | 53.52  | 0.69    |
| 11                      | 249.55      | 106,570 | 26,594,453 | 96.91   | 95.37   | 53.36  | 0.75    |
| 12                      | 249.56      | 109,128 | 27,234,016 | 96.87   | 95.32   | 53.43  | 0.18    |
| 13                      | 249.54      | 105,718 | 26,381,097 | 96.95   | 95.43   | 53.26  | 0.00    |
| 14                      | 249.56      | 111,004 | 27,701,636 | 96.80   | 95.18   | 53.70  | 0.00    |
| 15                      | 249.57      | 106,562 | 26,594,728 | 96.93   | 95.38   | 53.42  | 0.83    |
| 16                      | 249.52      | 101,180 | 25,246,477 | 96.76   | 95.13   | 53.52  | 3.56    |
| 17                      | 249.57      | 103,002 | 25,706,130 | 96.88   | 95.34   | 53.41  | 0.00    |
| 18                      | 249.56      | 109,834 | 27,410,112 | 97.01   | 95.51   | 53.43  | 0.22    |
| 19                      | 249.55      | 112,472 | 28,067,249 | 96.63   | 94.96   | 54.20  | 1.50    |
| 20                      | 249.61      | 110,260 | 27,521,466 | 96.68   | 95.05   | 53.59  | 0.00    |
| 21                      | 249.57      | 110,580 | 27,597,078 | 96.76   | 95.15   | 53.86  | 1.38    |

**Table S2.** Alpha diversity index of bacterial microbiomes in the 1<sup>st</sup> experiment (a) and 2<sup>nd</sup> experiment (b).

| Day        | Sample Type | Ace        | Chao1  | Shannon | Simpson | Goods_Coverage |      |
|------------|-------------|------------|--------|---------|---------|----------------|------|
| a          | -8          | Control    | 496.15 | 498.50  | 7.51    | 0.99           | 1.00 |
|            | -4          | Control    | 505.37 | 505.77  | 7.28    | 0.98           | 1.00 |
|            |             | Control    | 507.24 | 505.67  | 7.28    | 0.98           | 1.00 |
|            |             | Control    | 514.84 | 524.25  | 7.33    | 0.99           | 1.00 |
|            |             | Control    | 500.98 | 502.56  | 7.31    | 0.99           | 1.00 |
|            |             | Control    | 507.01 | 510.04  | 7.06    | 0.98           | 1.00 |
|            | 0           | Control    | 496.80 | 497.96  | 7.09    | 0.98           | 1.00 |
|            |             | Control    | 503.19 | 505.16  | 7.17    | 0.98           | 1.00 |
|            |             | Control    | 500.64 | 503.07  | 7.18    | 0.98           | 1.00 |
|            |             | Control    | 491.18 | 501.07  | 6.88    | 0.98           | 1.00 |
|            | 3           | Control    | 485.94 | 486.12  | 6.86    | 0.98           | 1.00 |
|            |             | Dispersant | 497.92 | 498.92  | 6.95    | 0.98           | 1.00 |
|            |             | Dispersant | 511.50 | 516.44  | 7.00    | 0.98           | 1.00 |
|            |             | Control    | 479.29 | 482.00  | 6.84    | 0.98           | 1.00 |
|            | 9           | Control    | 485.43 | 487.10  | 6.81    | 0.98           | 1.00 |
|            |             | Dispersant | 487.70 | 499.46  | 6.93    | 0.98           | 1.00 |
| Dispersant |             | 499.36     | 505.77 | 7.01    | 0.98    | 1.00           |      |
| Dispersant |             | 499.36     | 505.77 | 7.01    | 0.98    | 1.00           |      |
| b          | -8          | Control    | 142.72 | 143.00  | 6.13    | 0.98           | 1.00 |
|            | -4          | Control    | 147.96 | 147.50  | 6.15    | 0.98           | 1.00 |
|            |             | Control    | 145.50 | 146.00  | 6.08    | 0.98           | 1.00 |
|            |             | Control    | 147.54 | 147.67  | 6.05    | 0.97           | 1.00 |
|            |             | Control    | 145.45 | 144.75  | 6.13    | 0.98           | 1.00 |
|            |             | Control    | 148.99 | 151.00  | 6.08    | 0.98           | 1.00 |
|            | 0           | Control    | 152.65 | 155.00  | 6.03    | 0.97           | 1.00 |
|            |             | Control    | 151.21 | 151.00  | 6.08    | 0.98           | 1.00 |
|            |             | Control    | 151.42 | 152.50  | 6.03    | 0.97           | 1.00 |
|            |             | Control    | 151.42 | 152.50  | 6.03    | 0.97           | 1.00 |
|            | 3           | Dispersant | 153.36 | 153.25  | 5.97    | 0.97           | 1.00 |
|            |             | Dispersant | 148.79 | 148.62  | 5.88    | 0.97           | 1.00 |
|            |             | Au-NPs     | 154.56 | 154.62  | 5.95    | 0.97           | 1.00 |
|            |             | Au-NPs     | 151.37 | 151.62  | 5.83    | 0.97           | 1.00 |
|            | 9           | Dispersant | 145.93 | 147.11  | 5.58    | 0.96           | 1.00 |
|            |             | Dispersant | 143.94 | 145.67  | 5.61    | 0.95           | 1.00 |
| Au-NPs     |             | 152.35     | 152.00 | 5.62    | 0.95    | 1.00           |      |
| Au-NPs     |             | 148.82     | 147.50 | 5.75    | 0.96    | 1.00           |      |

**Table S3.** Number of sequences obtained and quality scores of the sequences for the 2<sup>nd</sup> experiment (dispersant and AuNPs experiment).

| GENEWIZ NGS 16S-EZ ANALYSIS REPORT |             |         |            |         |         |        |         |
|------------------------------------|-------------|---------|------------|---------|---------|--------|---------|
| Sample                             | Length (bp) | # Reads | Bases (bp) | Q20 (%) | Q30 (%) | GC (%) | N (ppm) |
| FW01-1-16S                         | 249.48      | 70,434  | 17,571,669 | 96.36   | 94.86   | 53.17  | 0.57    |
| FW02-2-16S                         | 249.43      | 33,228  | 8,288,110  | 94.29   | 92.20   | 53.17  | 0.48    |
| FW03-3-16S                         | 249.49      | 63,492  | 15,840,926 | 96.27   | 94.72   | 53.13  | 0.57    |
| FW04-4-16S                         | 249.46      | 49,244  | 12,284,184 | 96.12   | 94.51   | 53.09  | 0.00    |
| FW05-5-16S                         | 249.48      | 60,292  | 15,041,497 | 96.24   | 94.65   | 53.10  | 6.12    |
| FW06-6-16S                         | 249.54      | 58,266  | 14,539,872 | 96.49   | 94.98   | 53.45  | 0.14    |
| FW07-7-16S                         | 249.52      | 33,598  | 8,383,422  | 96.40   | 94.87   | 53.63  | 0.36    |
| FW08-8-16S                         | 249.56      | 63,900  | 15,946,803 | 95.87   | 94.17   | 53.36  | 1.25    |
| FW09-9-16S                         | 249.50      | 51,558  | 12,863,469 | 96.92   | 95.58   | 53.37  | 1.32    |
| FW10-10-16S                        | 249.43      | 28,894  | 7,207,084  | 95.05   | 93.20   | 53.45  | 0.00    |
| FW11-11-16S                        | 249.49      | 55,262  | 13,787,192 | 96.86   | 95.50   | 53.58  | 0.07    |
| FW12-12-16S                        | 249.51      | 38,796  | 9,679,822  | 96.94   | 95.60   | 53.44  | 1.65    |
| FW13-13-16S                        | 249.52      | 52,862  | 13,190,057 | 96.93   | 95.58   | 53.51  | 1.59    |
| FW14-14-16S                        | 249.45      | 44,378  | 11,070,042 | 97.12   | 95.87   | 53.41  | 1.81    |
| FW15-15-16S                        | 249.55      | 27,144  | 6,773,743  | 97.01   | 95.70   | 53.46  | 0.30    |
| FW16-16-16S                        | 249.52      | 49,148  | 12,263,374 | 96.57   | 95.14   | 53.46  | 1.30    |
| FW17-17-16S                        | 249.47      | 63,582  | 15,861,860 | 96.56   | 95.10   | 53.39  | 2.71    |

**Table S4.** Measured dissolved organic carbon concentration in influent and effluent of the STPs and the elimination rate throughout the two experiments.

| Experiment 1 (Control vs. Dispersant) |                        |                    |                        |                           |                    |                        |
|---------------------------------------|------------------------|--------------------|------------------------|---------------------------|--------------------|------------------------|
| Day                                   | Control—Replicate 1    |                    |                        | Control—Replicate 2       |                    |                        |
|                                       | Influent<br>[mg/L]     | Effluent<br>[mg/L] | DOC-Elimination<br>[%] | Influent<br>[mg/L]        | Effluent<br>[mg/L] | DOC-Elimination<br>[%] |
| -6                                    | 175                    | 6.4                | 96                     | 143                       | 6.8                | 95                     |
| -4                                    | 148                    | 7.9                | 95                     | 125                       | 5.4                | 96                     |
| 0                                     | 139                    | 4.8                | 97                     | 122                       | 3.7                | 97                     |
| 2                                     | 136                    | 4.8                | 96                     | 126                       | 3.9                | 97                     |
| 4                                     | 132                    | 4.7                | 96                     | 124                       | 3.7                | 97                     |
| 6                                     | 128                    | 4.5                | 96                     | 121                       | 3.4                | 97                     |
| 9                                     | 165                    | 4.0                | 98                     | 142                       | 3.6                | 97                     |
| Day                                   | Dispersant—Replicate 1 |                    |                        | Dispersant— - Replicate 2 |                    |                        |
|                                       | Influent<br>[mg/L]     | Effluent<br>[mg/L] | DOC-Elimination<br>[%] | Influent<br>[mg/L]        | Effluent<br>[mg/L] | DOC-Elimination<br>[%] |
| -6                                    | 146                    | 6.8                | 95                     | 151                       | 6.5                | 96                     |
| -4                                    | 117                    | 5.4                | 95                     | 134                       | 6.1                | 95                     |
| 0                                     | 123                    | 3.2                | 97                     | 161                       | 3.7                | 98                     |
| 2                                     | 116                    | 3.4                | 97                     | 130                       | 4.5                | 97                     |
| 4                                     | 118                    | 3.9                | 97                     | 123                       | 4.0                | 97                     |
| 6                                     | 121                    | 4.4                | 96                     | 116                       | 3.5                | 97                     |
| 9                                     | 158                    | 3.9                | 98                     | 136                       | 3.2                | 98                     |
| Experiment 2 (Dispersant vs. AuNPs)   |                        |                    |                        |                           |                    |                        |
| Day                                   | Dispersant—Replicate 1 |                    |                        | Dispersant—Replicate 2    |                    |                        |
|                                       | Influent<br>[mg/L]     | Effluent<br>[mg/L] | DOC-Elimination<br>[%] | Influent<br>[mg/L]        | Effluent<br>[mg/L] | DOC-Elimination<br>[%] |
| -6                                    | 151                    | 5.9                | 96                     | 154                       | 4.0                | 97                     |
| -4                                    | 135                    | 3.8                | 97                     | 152                       | 3.8                | 97                     |
| 0                                     | 143                    | 4.4                | 97                     | 153                       | 0.3                | 100                    |
| 2                                     | 129                    | 3.6                | 97                     | 143                       | 0.3                | 100                    |
| 4                                     | 126                    | 4.0                | 97                     | 138                       | 3.9                | 97                     |
| 6                                     | 133                    | 3.8                | 97                     | 132                       | 3.8                | 97                     |
| 9                                     | 129                    | 3.4                | 97                     | 128                       | 3.7                | 97                     |
| Day                                   | AuNP—Replicate 1       |                    |                        | AuNP—Replicate 2          |                    |                        |
|                                       | Influent<br>[mg/L]     | Effluent<br>[mg/L] | DOC-Elimination<br>[%] | Influent<br>[mg/L]        | Effluent<br>[mg/L] | DOC-Elimination<br>[%] |
| -6                                    | 152                    | 3.9                | 97                     | 152                       | 3.9                | 97                     |
| -4                                    | 147                    | 4.4                | 97                     | 149                       | 3.9                | 97                     |
| 0                                     | 145                    | 4.3                | 97                     | 148                       | 4.1                | 97                     |
| 2                                     | 137                    | 4.2                | 97                     | 149                       | 4.1                | 97                     |
| 4                                     | 160                    | 4.1                | 97                     | 145                       | 3.8                | 97                     |
| 6                                     | 117                    | 3.9                | 97                     | 135                       | 3.8                | 97                     |
| 9                                     | 117                    | 3.4                | 97                     | 119                       | 3.5                | 97                     |

**Table S5.** Measured pH values in the denitrification, nitrification and settling tank of the STPs throughout the two experiments.

| <b>Experiment 1 (Control vs. Dispersant)</b> |                               |                      |                      |                               |                      |                      |
|----------------------------------------------|-------------------------------|----------------------|----------------------|-------------------------------|----------------------|----------------------|
| <b>Day</b>                                   | <b>Control—Replicate 1</b>    |                      |                      | <b>Control—Replicate 2</b>    |                      |                      |
|                                              | <b>Denitrification</b>        | <b>Nitrification</b> | <b>Settling Tank</b> | <b>Denitrification</b>        | <b>Nitrification</b> | <b>Settling Tank</b> |
| −6                                           | 7.5                           | 7.5                  | 7.3                  | 7.5                           | 7.5                  | 7.4                  |
| −4                                           | 7.4                           | 7.3                  | 7.3                  | 7.3                           | 7.4                  | 7.3                  |
| 0                                            | 7.3                           | 7.4                  | 7.3                  | 7.4                           | 7.3                  | 7.3                  |
| 2                                            | 7.3                           | 7.3                  | 7.3                  | 7.3                           | 7.3                  | 7.3                  |
| 6                                            | 7.3                           | 7.3                  | 7.3                  | 7.3                           | 7.3                  | 7.2                  |
| 9                                            | 7.3                           | 7.3                  | 7.2                  | 7.3                           | 7.3                  | 7.2                  |
| <b>Experiment 1 (Control vs. Dispersant)</b> |                               |                      |                      |                               |                      |                      |
| <b>Day</b>                                   | <b>Dispersant—Replicate 1</b> |                      |                      | <b>Dispersant—Replicate 2</b> |                      |                      |
|                                              | <b>Denitrification</b>        | <b>Nitrification</b> | <b>Settling Tank</b> | <b>Denitrification</b>        | <b>Nitrification</b> | <b>Settling Tank</b> |
| −6                                           | 7.4                           | 7.4                  | 7.3                  | 7.5                           | 7.5                  | 7.4                  |
| −4                                           | 7.4                           | 7.4                  | 7.3                  | 7.4                           | 7.3                  | 7.3                  |
| 0                                            | 7.3                           | 7.4                  | 7.3                  | 7.3                           | 7.3                  | 7.4                  |
| 2                                            | 7.3                           | 7.4                  | 7.3                  | 7.3                           | 7.3                  | 7.3                  |
| 6                                            | 7.4                           | 7.4                  | 7.3                  | 7.3                           | 7.3                  | 7.2                  |
| 9                                            | 7.3                           | 7.3                  | 7.3                  | 7.3                           | 7.3                  | 7.2                  |
| <b>Experiment 2 (Dispersant vs. AuNPs)</b>   |                               |                      |                      |                               |                      |                      |
| <b>Day</b>                                   | <b>Dispersant—Replicate 1</b> |                      |                      | <b>Dispersant—Replicate 2</b> |                      |                      |
|                                              | <b>Denitrification</b>        | <b>Nitrification</b> | <b>Settling tank</b> | <b>Denitrification</b>        | <b>Nitrification</b> | <b>Settling tank</b> |
| −6                                           | 7.4                           | 7.5                  | 7.4                  | 7.6                           | 7.6                  | 7.5                  |
| −4                                           | 7.3                           | 7.2                  | 7.2                  | 7.4                           | 7.3                  | 7.1                  |
| 0                                            | 7.2                           | 7.0                  | 7.0                  | 7.3                           | 7.0                  | 7.0                  |
| 2                                            | 7.2                           | 7.0                  | 7.0                  | 7.3                           | 7.0                  | 7.0                  |
| 6                                            | 7.3                           | 7.1                  | 7.1                  | 7.3                           | 7.1                  | 7.1                  |
| 9                                            | 7.2                           | 7.0                  | 6.9                  | 7.2                           | 7.1                  | 7.0                  |
| <b>Experiment 2 (Dispersant vs. AuNPs)</b>   |                               |                      |                      |                               |                      |                      |
| <b>Day</b>                                   | <b>AuNP—Replicate 1</b>       |                      |                      | <b>AuNP—Replicate 2</b>       |                      |                      |
|                                              | <b>Denitrification</b>        | <b>Nitrification</b> | <b>Settling tank</b> | <b>Denitrification</b>        | <b>Nitrification</b> | <b>Settling tank</b> |
| −6                                           | 7.5                           | 7.3                  | 7.3                  | 7.5                           | 7.3                  | 7.2                  |
| −4                                           | 7.4                           | 7.1                  | 7.1                  | 7.4                           | 7.0                  | 6.9                  |
| 0                                            | 7.3                           | 7.0                  | 7.0                  | 7.4                           | 6.9                  | 6.8                  |
| 2                                            | 7.3                           | 6.9                  | 6.9                  | 7.3                           | 6.8                  | 6.8                  |
| 6                                            | 7.2                           | 7.1                  | 7.0                  | 7.3                           | 6.9                  | 6.8                  |
| 9                                            | 7.2                           | 7.0                  | 6.9                  | 7.3                           | 7.0                  | 6.8                  |

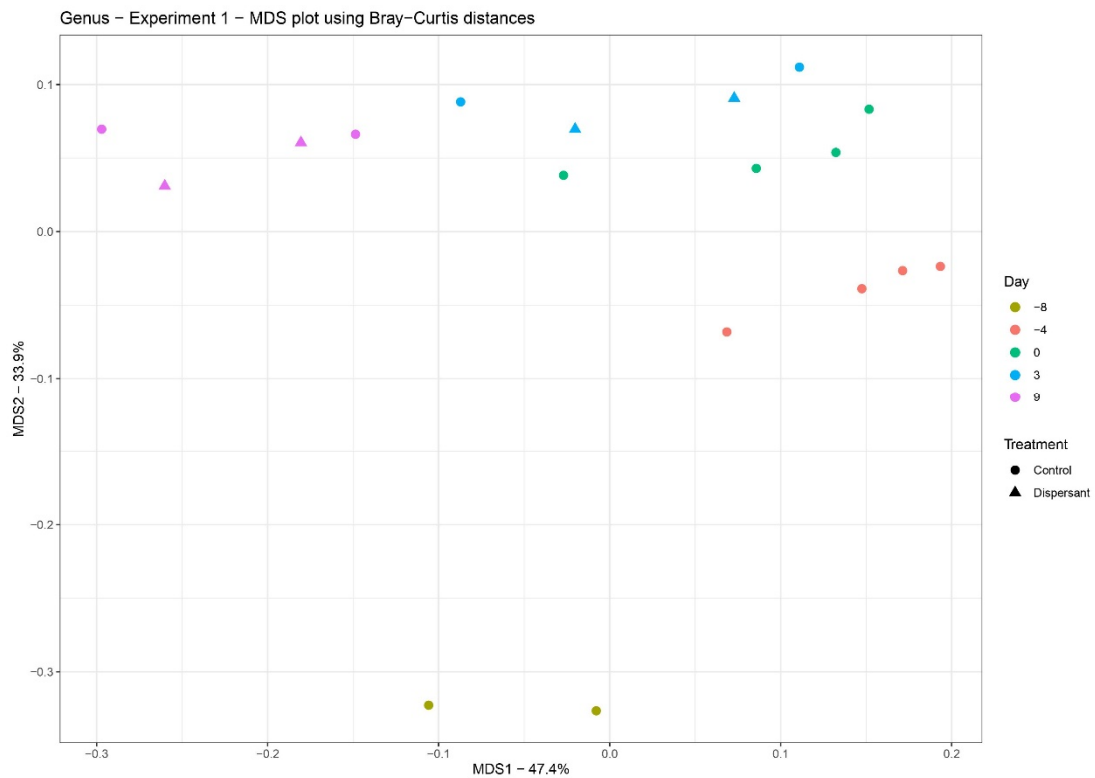

**Figure S1.** PCoA of bacterial communities, evaluated to genus level, using Bray-Curtis distance. Symbols represent control (●) and dispersant (Δ), and color codes represent the different sampling points: yellow (day -8), red (day -4), green (day 0), blue (day 3) and purple (day 9).

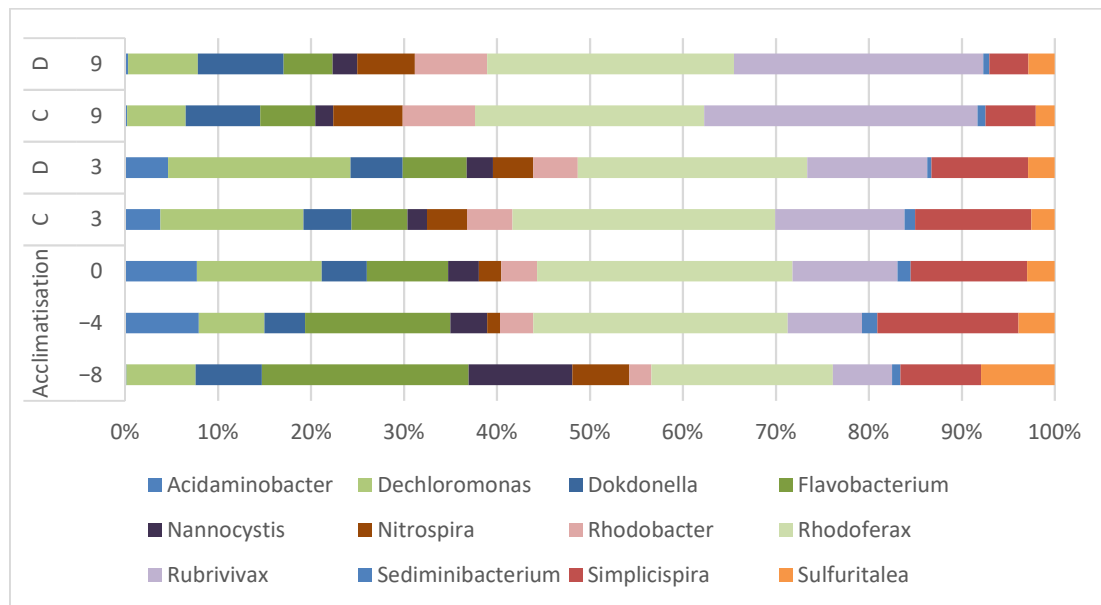

**Figure S2.** Mean abundances at genus level of the sludge community from collection of fresh sludge until day 9 (C = control treatment and D = dispersant treatment).

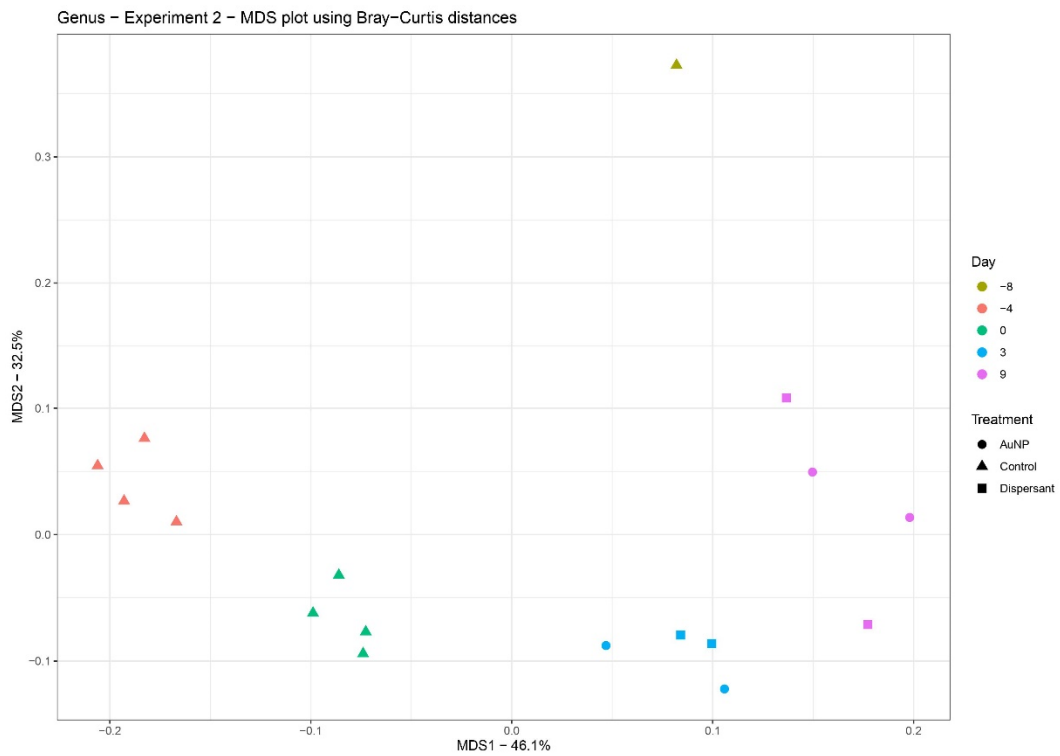

**Figure S3.** PCoA of bacterial communities, evaluated to genus level, using Bray-Curtis distance. Symbols represent control ( $\Delta$ ), applied with AuNPs ( $\bullet$ ) and dispersant ( $\blacktriangleright$ ), and color codes represent the different sampling points: yellow (day -8), red (day -4), green (day 0), blue (day 3) and purple (day 9).

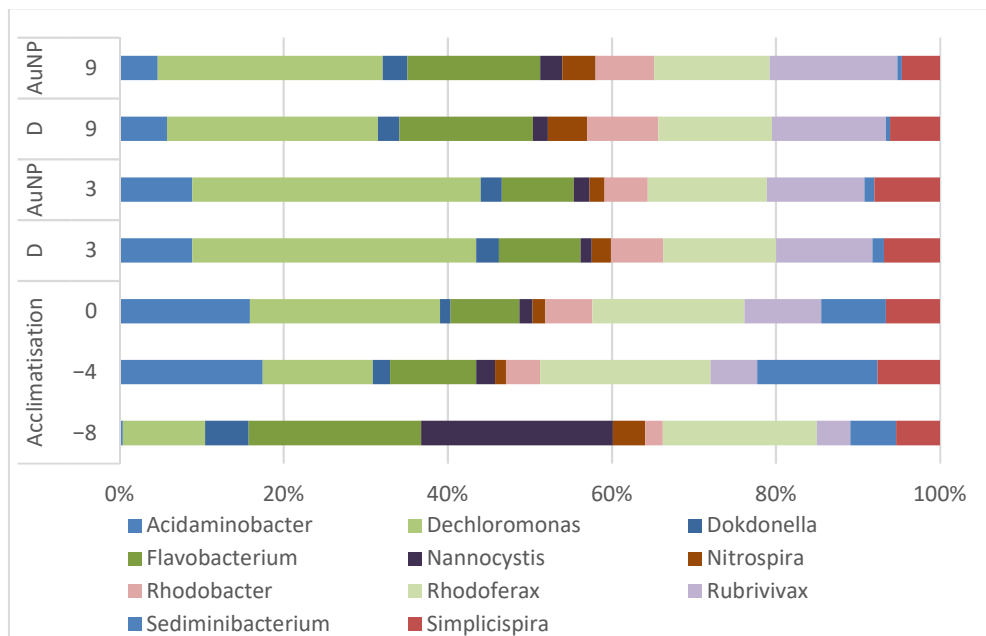

**Figure S4.** Mean abundance at genus level of the sludge, during the experiment course, before and after the application of dispersant (D) and AuNPs.
